# Supplementary material
Source: PubMed Central journal article supplement (PMC2734133)
Supplement: msn166_1.pdf [file msn166_1.pdf]

Table S1. Sequences used in analyses.

| Ingroup species                  | Accession numbers                                                                                                         | Outgroup species        | Accession number | Blastclust Parameters (L-S) |
|----------------------------------|---------------------------------------------------------------------------------------------------------------------------|-------------------------|------------------|-----------------------------|
| <i>Burkholderia pseudomallei</i> | NC_009076,<br>NC_007434,<br>NC_009074,<br>NC_006350                                                                       | <i>B. thailandensis</i> | NC_007651        | 0.9-1.75                    |
| <i>Campylobacter jejuni</i>      | NC_003912,<br>NC_008787,<br>NC_002163                                                                                     | <i>C. fetus</i>         | NC_008599        | 0.5-0.5                     |
| <i>Chlamydophila pneumoniae</i>  | NC_002179,<br>NC_000922,<br>NC_002491,<br>NC_005043                                                                       | <i>C. felis</i>         | NC_007899        | 0.5-0.5                     |
| <i>Ehrlichia ruminantium</i>     | NC_005295,<br>NC_006831,<br>NC_006832                                                                                     | <i>E. chaffeensis</i>   | NC_007799        | 0.5-1                       |
| <i>Helicobacter pylori</i>       | NC_000915,<br>NC_008086,<br>NC_000921                                                                                     | <i>H. acinonychis</i>   | NC_008229        | 0.5-1                       |
| <i>Neisseria meningitidis</i>    | NC_008767,<br>NC_003112,<br>NC003116                                                                                      | <i>N. gonorrhoeae</i>   | NC_002946        | 0.9-1.75                    |
| <i>Pseudomonas syringae</i>      | NC_005773,<br>NC_007005,<br>NC_004578                                                                                     | <i>P. fluorescens</i>   | NC_004129        | 0.9-1.75                    |
| <i>Shigella flexneri</i>         | NC_004741,<br>NC_004337,<br>NC_008258                                                                                     | <i>S. sonnei</i>        | NC_007384        | 0.9-1.75                    |
| <i>Staphylococcus aureus</i>     | NC_007622,<br>NC_002951,<br>NC_002952,<br>NC_002953,<br>NC_003923,<br>NC_002758,<br>NC_002745,<br>NC_007795,<br>NC_007793 | <i>S. epidermidis</i>   | NC_004461        | 0.5-1                       |
| <i>Streptococcus pneumoniae</i>  | NC_008533,<br>NC_003098,<br>NC_003028                                                                                     | <i>S. sanguinis</i>     | NC_009009        | 0.5-1                       |
| <i>Streptococcus pyogenes</i>    | NC_002737,<br>NC_008022,<br>NC_008024,<br>NC_008023,<br>NC_004070,                                                        | <i>S. agalactiae</i>    | NC_004368        | 0.5-1                       |

|                        |                                                                                               |                              |           |          |
|------------------------|-----------------------------------------------------------------------------------------------|------------------------------|-----------|----------|
|                        | NC_007297,<br>NC_007296,<br>NC_003485,<br>NC_008021,<br>NC_004606,<br>NC_009332,<br>NC_004368 |                              |           |          |
| <i>Yersinia pestis</i> | NC_008150,<br>NC_003143,<br>NC_004088,<br>NC_008149,<br>NC_005810                             | <i>Y. pseudotuberculosis</i> | NC_006155 | 0.9-1.75 |
