# Supplementary material
Source: PubMed Central journal article supplement (PMC2734133)
Supplement: msn166_2.pdf [file msn166_2.pdf]

Table S2. Means  $\pm$  S.E. (and medians) of variables describing codon usage in genes analyzed for ingroup species.

|                                  | T2                              | A2                              | T4                              | A4                              | C4                              |
|----------------------------------|---------------------------------|---------------------------------|---------------------------------|---------------------------------|---------------------------------|
| <i>Burkholderia pseudomallei</i> | 0.1846 $\pm$ 0.017<br>(0.1754)  | 0.2236 $\pm$ 0.024<br>(0.2105)  | 0.0264 $\pm$ 0.0005<br>(0.0217) | 0.0216 $\pm$ 0.0004<br>(0.0177) | 0.4460 $\pm$ 0.0012<br>(0.4470) |
| <i>Campylobacter jejuni</i>      | 0.8565 $\pm$ 0.0021<br>(0.8633) | 0.8351 $\pm$ 0.0023<br>(0.8370) | 0.5112 $\pm$ 0.0023<br>(0.5124) | 0.3016 $\pm$ 0.0021<br>(0.3000) | 0.1036 $\pm$ 0.0016<br>(0.0976) |
| <i>Chlamydophila pneumoniae</i>  | 0.6630 $\pm$ 0.0069<br>(0.6719) | 0.6649 $\pm$ 0.0071<br>(0.6738) | 0.3949 $\pm$ 0.0049<br>(0.3935) | 0.2712 $\pm$ 0.0036<br>(0.2717) | 0.1986 $\pm$ 0.0042<br>(0.1950) |
| <i>Ehrlichia ruminantium</i>     | 0.8231 $\pm$ 0.0037<br>(0.8389) | 0.7632 $\pm$ 0.0041<br>(0.7647) | 0.4404 $\pm$ 0.0043<br>(0.4430) | 0.4332 $\pm$ 0.0045<br>(0.4124) | 0.0584 $\pm$ 0.0015<br>(0.0520) |
| <i>Helicobacter pylori</i>       | 0.6818 $\pm$ 0.0019<br>(0.6823) | 0.6993 $\pm$ 0.0022<br>(0.7046) | 0.3419 $\pm$ 0.0019<br>(0.3371) | 0.1235 $\pm$ 0.0012<br>(0.1198) | 0.2567 $\pm$ 0.0019<br>(0.2537) |
| <i>Neisseria meningitidis</i>    | 0.3953 $\pm$ 0.0042<br>(0.3856) | 0.6186 $\pm$ 0.0046<br>(0.6415) | 0.1577 $\pm$ 0.0024<br>(0.1444) | 0.1009 $\pm$ 0.0014<br>(0.0944) | 0.4456 $\pm$ 0.0038<br>(0.4485) |
| <i>Pseudomonas syringae</i>      | 0.2640 $\pm$ 0.0028<br>(0.2593) | 0.3833 $\pm$ 0.0030<br>(0.3793) | 0.1800 $\pm$ 0.0023<br>(0.1667) | 0.0762 $\pm$ 0.0009<br>(0.0729) | 0.3933 $\pm$ 0.0020<br>(0.3934) |
| <i>Shigella flexneri</i>         | 0.4607 $\pm$ 0.0044<br>(0.4700) | 0.5844 $\pm$ 0.0035<br>(0.5870) | 0.2243 $\pm$ 0.0023<br>(0.2167) | 0.1282 $\pm$ 0.0018<br>(0.1206) | 0.2831 $\pm$ 0.0022<br>(0.2823) |
| <i>Staphylococcus aureus</i>     | 0.7966 $\pm$ 0.0020<br>(0.8101) | 0.8390 $\pm$ 0.0017<br>(0.8387) | 0.4050 $\pm$ 0.0020<br>(0.4000) | 0.3950 $\pm$ 0.0016<br>(0.3944) | 0.0854 $\pm$ 0.0011<br>(0.0811) |
| <i>Streptococcus pneumoniae</i>  | 0.6452 $\pm$ 0.0038<br>(0.6596) | 0.5964 $\pm$ 0.0042<br>(0.5909) | 0.3985 $\pm$ 0.0031<br>(0.3875) | 0.2638 $\pm$ 0.0023<br>(0.2564) | 0.2097 $\pm$ 0.0028<br>(0.2091) |
| <i>Streptococcus pyogenes</i>    | 0.7101 $\pm$ 0.0034<br>(0.7273) | 0.7083 $\pm$ 0.0030<br>(0.7054) | 0.4292 $\pm$ 0.0026<br>(0.4203) | 0.2730 $\pm$ 0.0019<br>(0.2705) | 0.1775 $\pm$ 0.0022<br>(0.1748) |
| <i>Yersinia pestis</i>           | 0.5887 $\pm$ 0.0114<br>(0.5862) | 0.5765 $\pm$ 0.0105<br>(0.5873) | 0.2399 $\pm$ 0.0065<br>(0.2329) | 0.1709 $\pm$ 0.0057<br>(0.1563) | 0.2813 $\pm$ 0.0072<br>(0.2794) |
